# Supplementary material for: The Determinants of Living with Long-Term Conditions: An International Cross-Sectional Study
Source: MDPI journal article supplement (doi:10.3390/ijerph181910381), 2021-10-02
Supplement: s1 [file s1]

**Table S1. Sociodemographic characteristics of the sample per long-term condition and historical data of the condition.**

| Variables                   | Categories           | LTCs                             |             |               |
|-----------------------------|----------------------|----------------------------------|-------------|---------------|
|                             |                      | COPD                             | CHF         | T2DM          |
|                             |                      | n (%)                            | n (%)       | n (%)         |
| <b>Gender</b>               | Men                  | 341 (55.7)                       | 320 (53.1)  | 276 (47.42)   |
|                             | Women                | 271 (44.3)                       | 283 (46.9)  | 306 (52.6)    |
| <b>Marital status</b>       | Single               | 80 (13.1)                        | 50 (8.3)    | 87 (15.0)     |
|                             | Married              | 303 (49.5)                       | 358 (59.4)  | 333 (57.5)    |
|                             | Widow                | 178 (29.1)                       | 145 (24)    | 93 (16.1)     |
|                             | Other                | 51 (8.3)                         | 50 (8.3)    | 66 (11.4)     |
| <b>Employment situation</b> | Employee             | 51 (8.3)                         | 57 (9.5)    | 174 (29.9)    |
|                             | Housekeeper          | 211 (34.5)                       | 199 (33)    | 159 (27.4)    |
|                             | Retired              | 214 (35.0)                       | 300 (49.8)  | 121 (20.8)    |
|                             | Other                | 136 (22.2)                       | 47 (7.8)    | 127 (21.9)    |
| <b>Educational level</b>    | Primary or basic     | 367 (60.2)                       | 396 (65.7)  | 350 (60.3)    |
|                             | Secondary level      | 165 (27.0)                       | 143 (23.7)  | 134 (23.1)    |
|                             | University           | 66 (10.8)                        | 52 (8.6)    | 85 (14.7)     |
|                             | Other                | 12 (2.0)                         | 12 (2)      | 11 (1.9)      |
|                             | <b>Range (years)</b> | <b>Mean (Standard Deviation)</b> |             |               |
| <b>Age</b>                  |                      | 70.62 (11.96)                    | 71.7 (11.4) | 64.15 (12.18) |
| <b>Age at LTC onset</b>     |                      | 62.26 (11.80)                    | 63.9 (12)   |               |
| <b>Duration of the LTC</b>  |                      | 6.91 (6.0)                       | 7.8 (7.4)   | 10.25 (9.51)  |

LTCs: Long-term conditions. COPD: chronic obstructive pulmonary disease; HF: chronic heart failure; T2DM: type 2 diabetes mellitus.
